# Supplementary material for: Serum metabolic profiling identified a distinct metabolic signature in patients with idiopathic pulmonary fibrosis – a potential biomarker role for LysoPC
Source: Springer Nature journal article supplement (doi:10.1186/s12931-018-0714-2), 2018-01-10

Item name: 20171115\_p009\_CCSSerum\_HDMSe\_pos\_020 Channel name: Low energy : Time 5.9996 +/- 0.0552 minutes...  
Item description: Extracted Y001 Serum

2.9e4

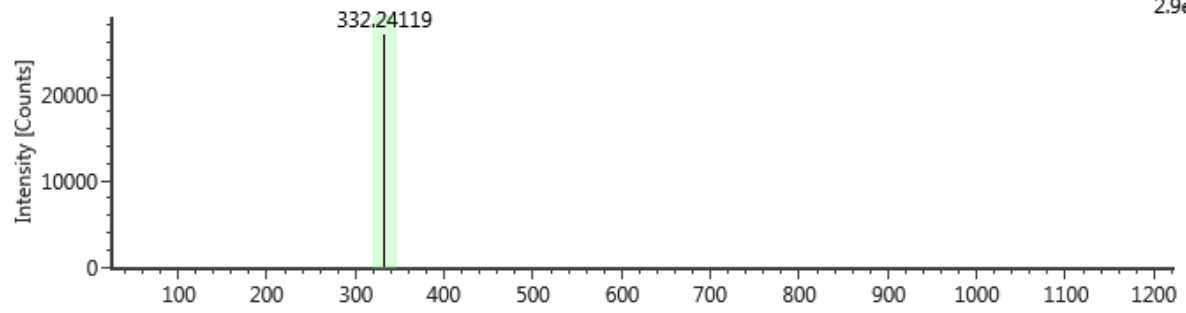

Item name: 20171115\_p009\_CCSSerum\_HDMSe\_pos\_020 Channel name: High energy : Time 5.9996 +/- 0.0552 minutes...  
Item description: Extracted Y001 Serum

6.52e3

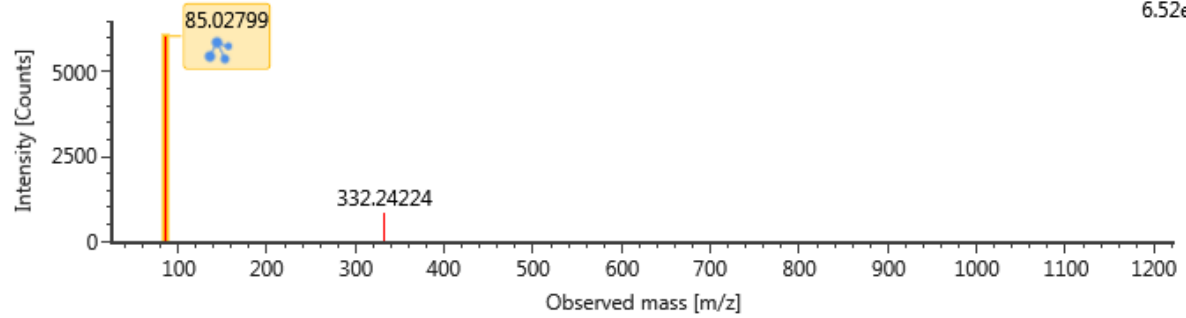

Supplement: MOESM2 [file 15356140]
