# Supplementary material for: Serum metabolic profiling identified a distinct metabolic signature in patients with idiopathic pulmonary fibrosis – a potential biomarker role for LysoPC
Source: Springer Nature journal article supplement (doi:10.1186/s12931-018-0714-2), 2018-01-10

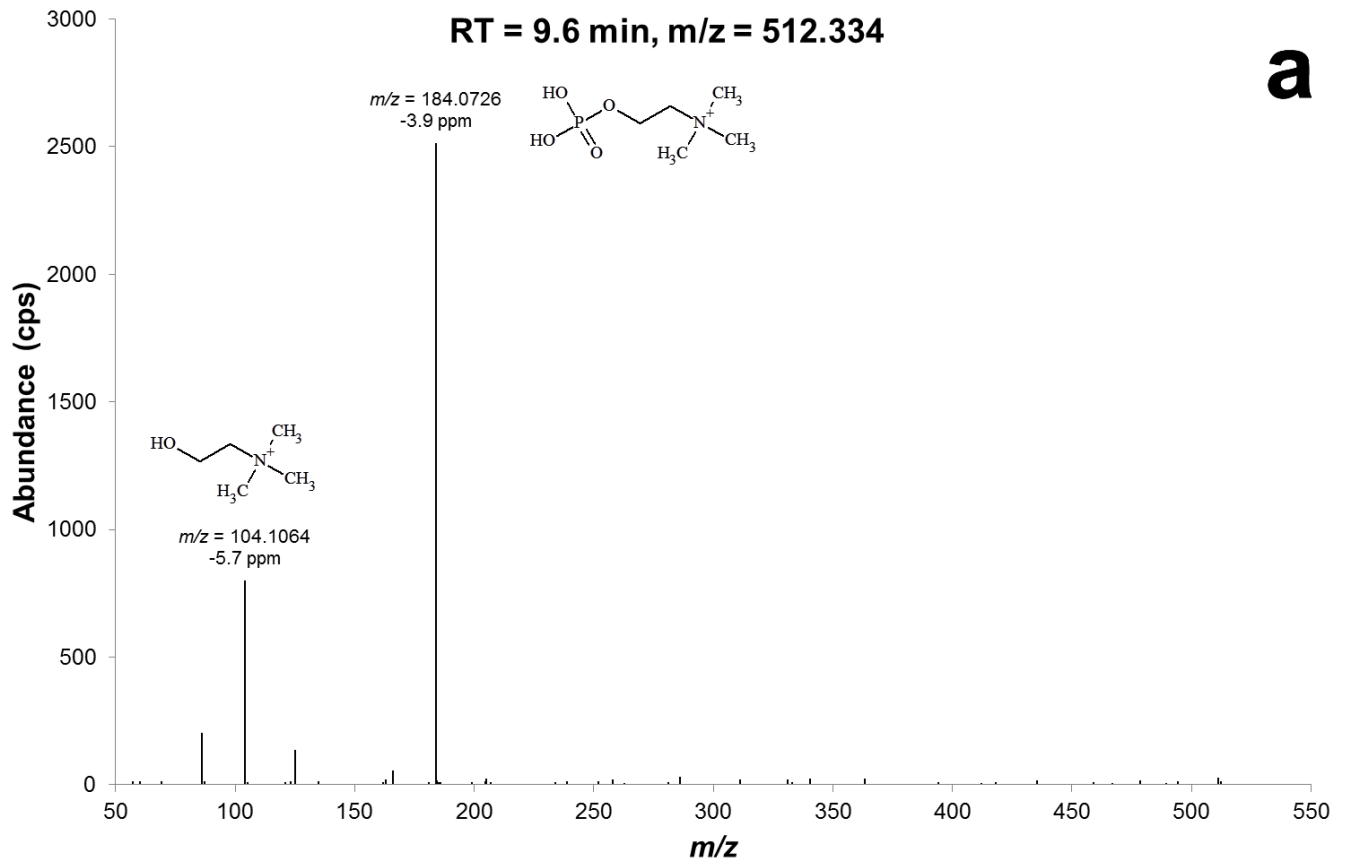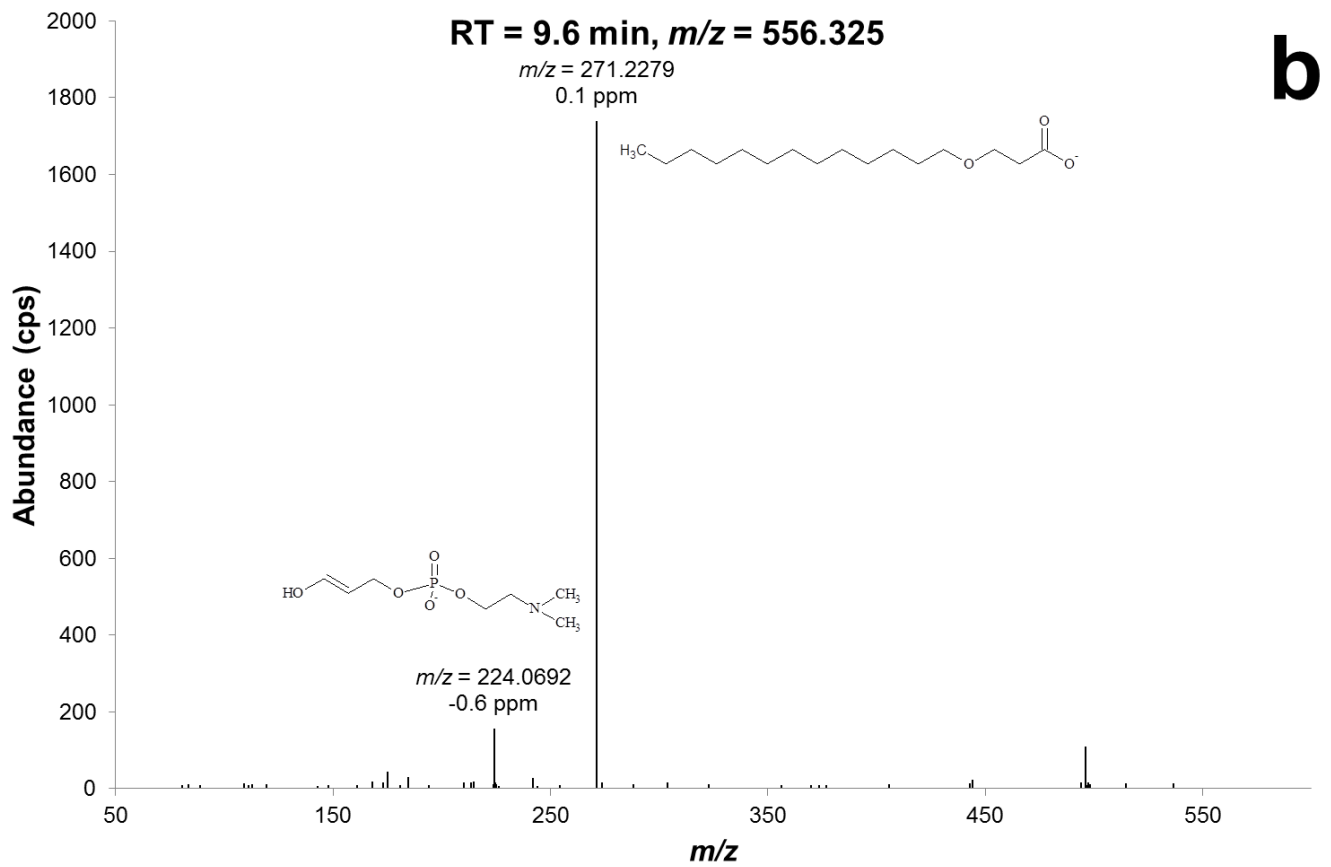

Supplement: MOESM3 [file 15356140]
